# Supplementary material
Source: Springer Nature journal article supplement (https://www.springermedizin.de/resource/supplementary/13058_2011_2938_MOESM7_ESM.pdf/9702934)

MCF7-TAMR MCF7-control

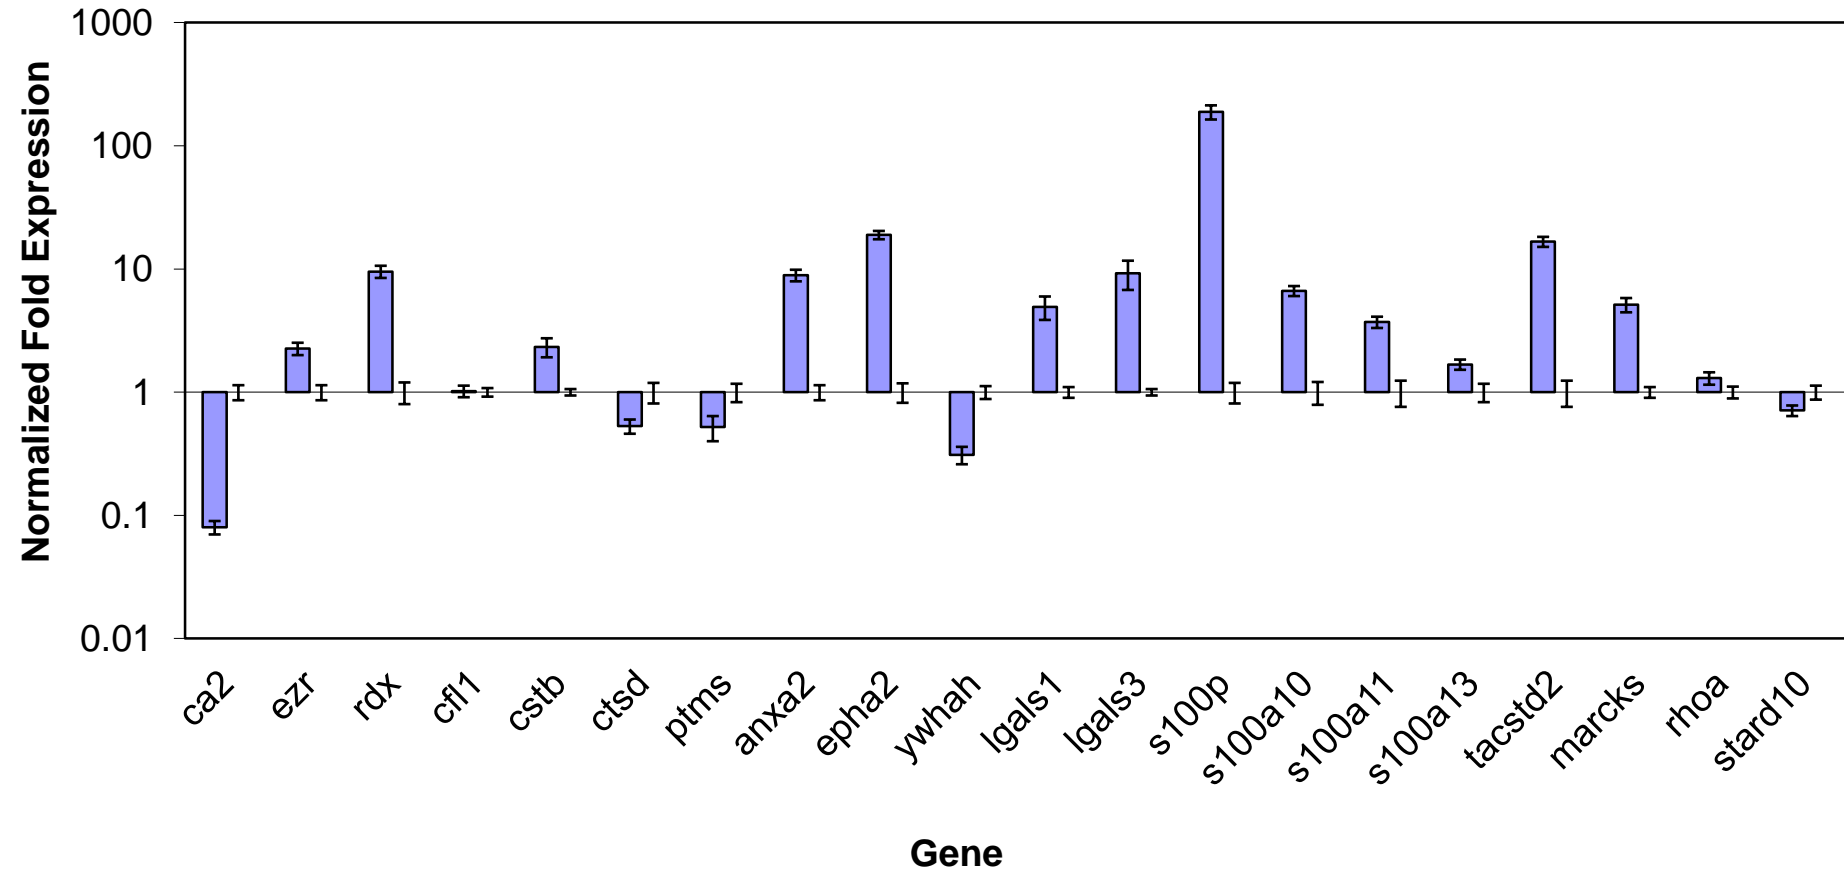

Supplement: MOESM7 [file 9702934]
